# Supplementary material for: SepF is the FtsZ anchor in archaea, with features of an ancestral cell division system
Source: PubMed Central journal article supplement (PMC8178401; doi:10.1038/s41467-021-23099-8), 2021-06-04
Supplement: 41467_2021_23099_MOESM1_ESM.pdf [file 41467_2021_23099_MOESM1_ESM.pdf]

1 **Supplementary information**

2

3

4

5

**SepF is the FtsZ anchor in archaea, with features of  
6 an ancestral cell division system**

7

8

9

10

11

**Pende N., Sogues A., et al. 2020**

12

13

14

15

16

17

18

19

20

21

22

23

24

25

26

27

28

29

30

31

32

33

34

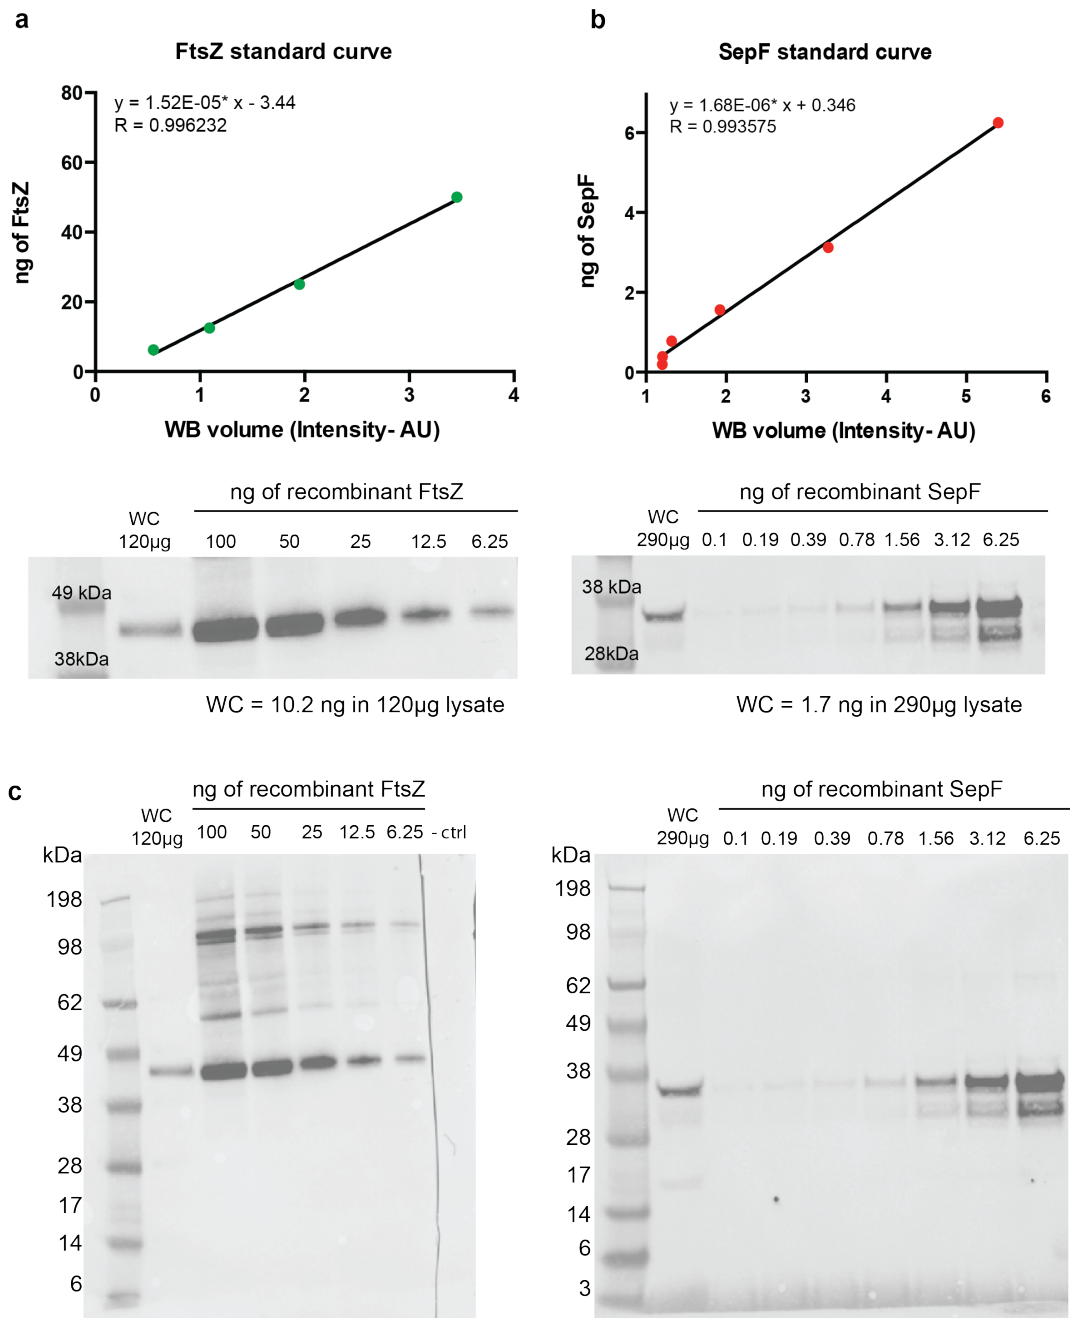

35  
 36 **Supplementary Figure 1. Molar ratio of FtsZ/SepF in *M. smithii* and characterization of**  
 37 **the specific anti-*MsFtsZ* and anti-*MsSepF* antibodies.** **a.** Serial dilutions of recombinant  
 38 FtsZ (100 ng to 6.25 ng). Band volumes were plotted against amount of FtsZ in order to  
 39 calculate the linear regression. 120 µg of the whole cell extract in exponential phase were  
 40 loaded and the total amount of FtsZ was calculated. **b.** Serial dilutions of recombinant SepF  
 41 (6.25 ng to 0.1 ng). Band volumes were plotted against amount of SepF in order to calculate  
 42 the linear regression. 290 µg of the whole cell extract in exponential phase were loaded and  
 43 the total amount of SepF was calculated. **c.** Full uncropped Western Blots. Molecular weight  
 44 markers (MW, in kDa) are shown on the side of the blot. The data shown here are  
 45 representative for experiments performed at least twice.

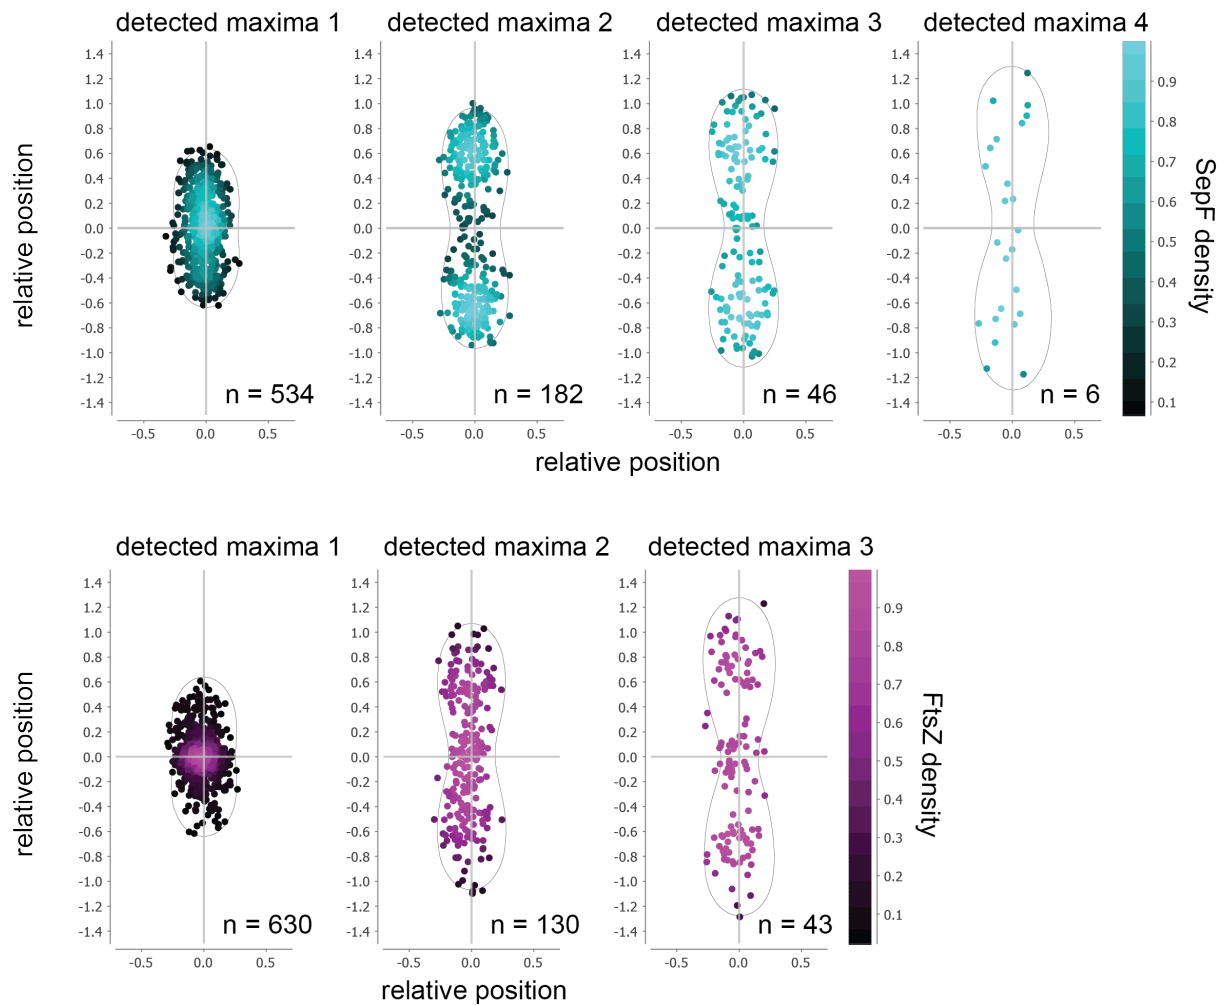

46  
 47  
 48  
 49  
 50  
 51  
 52  
 53  
 54  
 55  
 56  
 57  
 58

**Supplementary Figure 2. Localization of SepF and FtsZ maxima within *M. smithii* cells.**  
 Relative position of detected fluorescent maxima within the cell grouped into four classes for SepF (maxima detected 1-4, upper panel) and three for FtsZ (maxima detected 1-3, lower panel). n, number of cells for each group. The data shown here are representative for experiments performed three times.

59 **a**  
60  
61  
62  
63  
64  
65 **b**

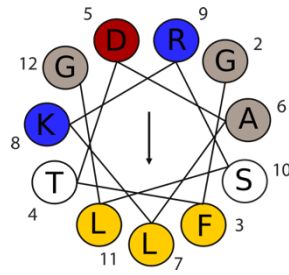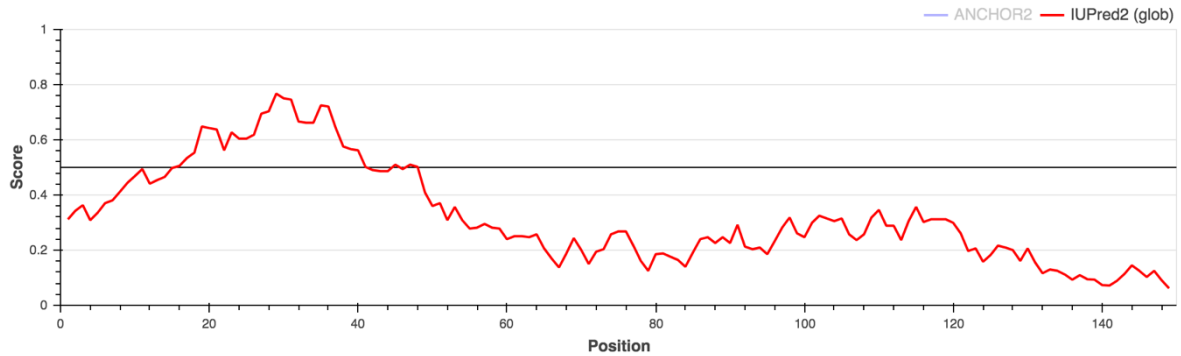

66  
67 **Supplementary Figure 3. Functional and structural domains of SepF from *M. smithii*.** **a.**  
68 Predicted amphipathic helix for the M domain comprising amino acids from 2 to 12. Amino acid  
69 properties color code: gray (non-charged) yellow (apolar), red (negatively charged) and blue  
70 (positively charged). The prediction was made using HELIQUEST <sup>1</sup>. **b.** Intrinsically disordered  
71 region prediction of SepF was made using the IUPred2A software <sup>2</sup>.

72  
73  
74  
75

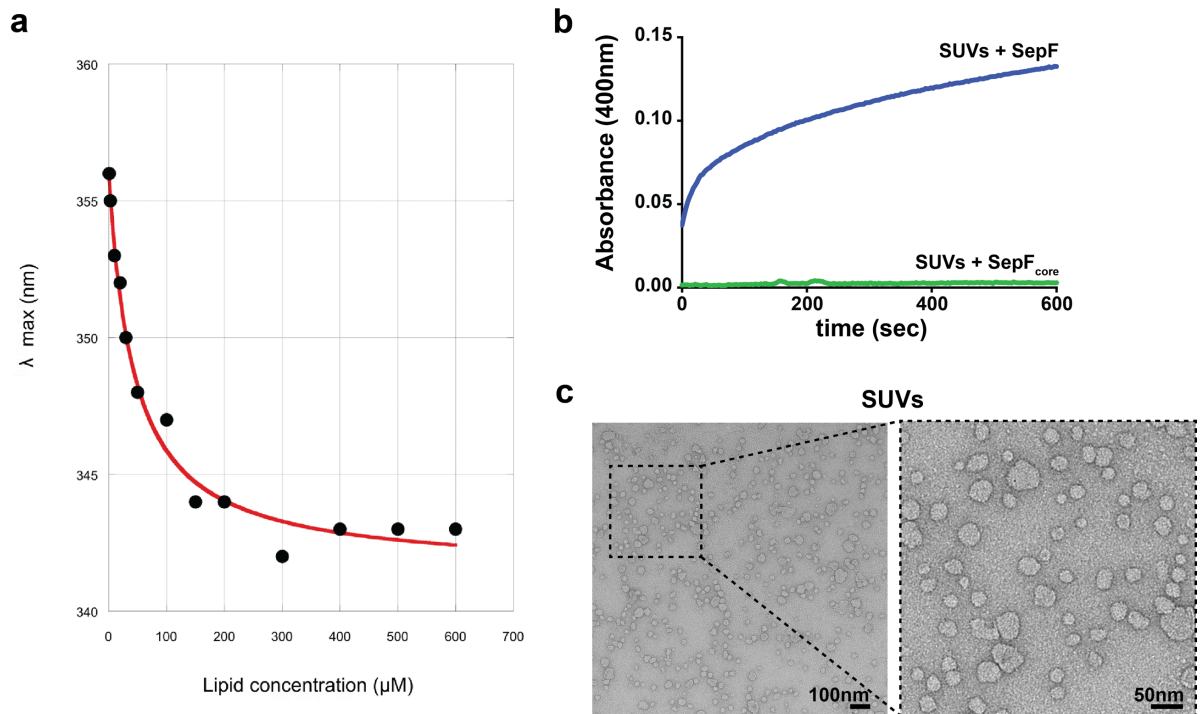

76

77 **Supplementary Figure 4. SepF – Membrane interaction.** **a.** Tryptophan fluorescence  
 78 titration assay using a modified SepF<sub>M</sub> peptide (including a N-terminal tryptophan residue) as  
 79 a function of lipid concentration (see Material and Methods for details). **b.** Polymerization assay  
 80 for SepF (blue line) and SepF<sub>core</sub> (green line) in the presence of SUVs. **c.** Negative stain  
 81 electron microscope image of SUVs (100  $\mu\text{mol L}^{-1}$ ) alone. Panels show original image with an  
 82 enlarged inlet that is marked by black dotted square next to it. Scale bar is 100 nm (original  
 83 image) and 50 nm (inlet).

84

85

86 a

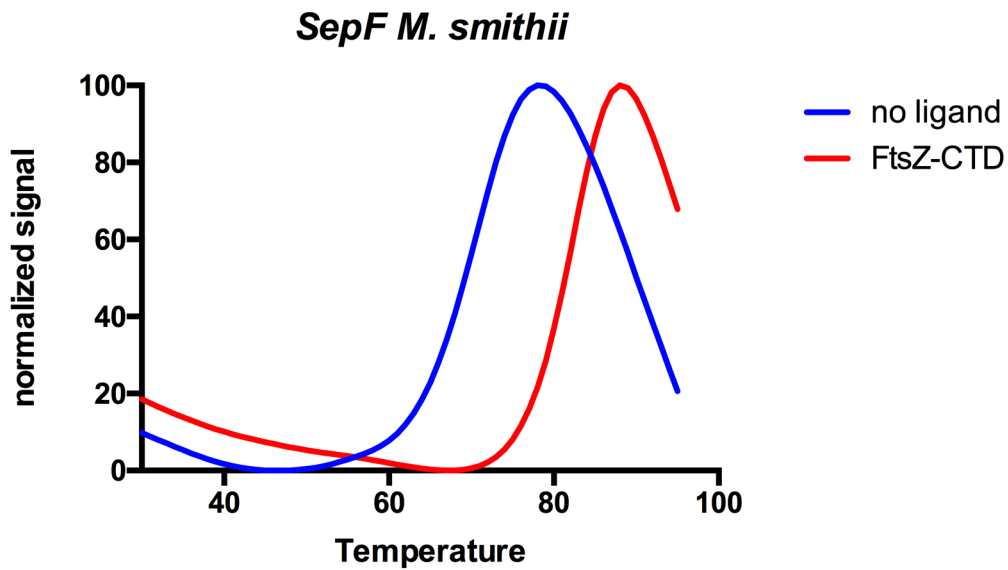

87

88 b

89

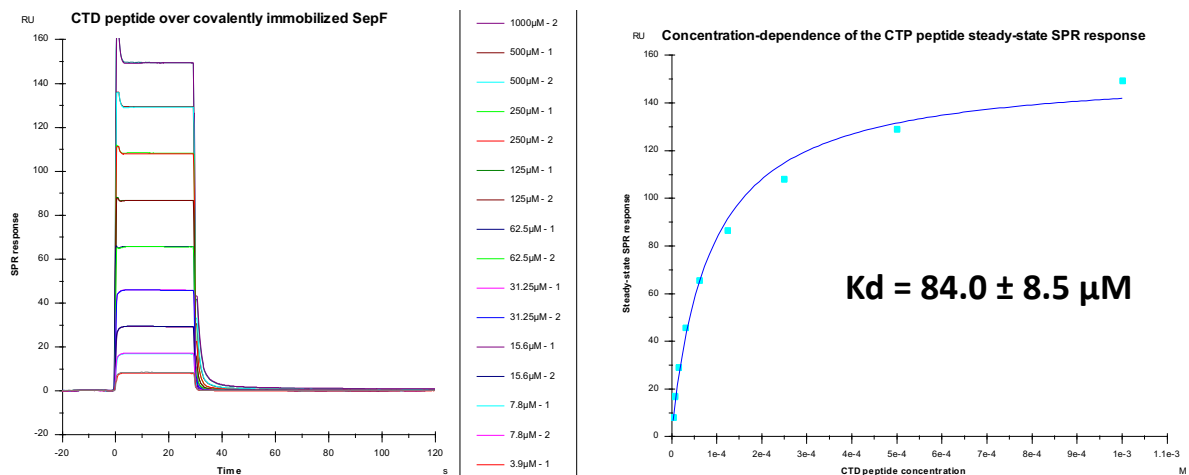

90

91 **Supplementary Figure 5. MsSepF-FtsZ<sub>CTD</sub> interactions.** a. Thermal denaturation curves of  
92 MsSepF<sub>core</sub> alone (blue) and upon addition of the FtsZ<sub>CTD</sub> peptide (red). The significant  
93 increase of protein thermostability ( $T_m$  values of 70.6 °C and 82.3 °C, respectively) indicates  
94 a strong interaction *in vitro*. Experiments were performed in triplicates. b. SPR analysis of  
95 the interaction between SepF<sub>core</sub> and FtsZ<sub>CTD</sub>.

96

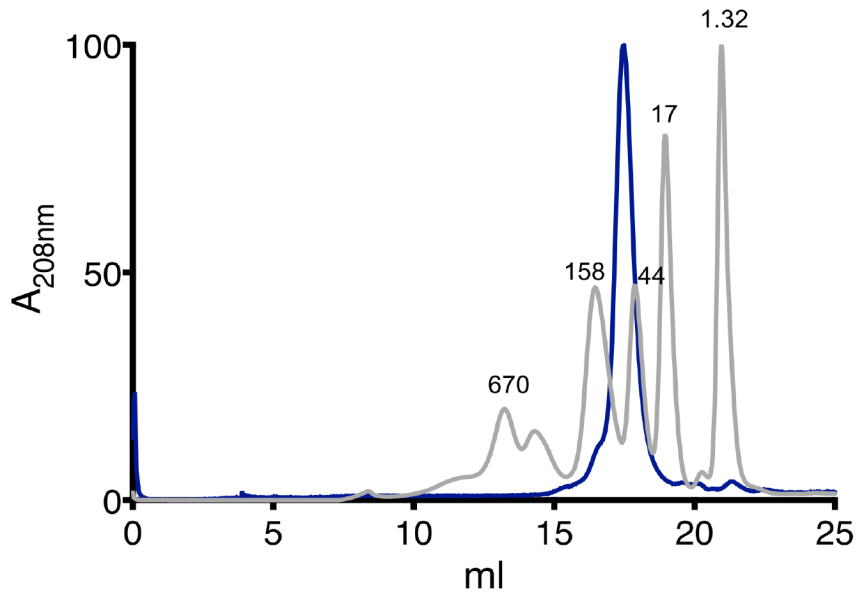

97  
 98 **Supplementary Figure 6. Size exclusion chromatography of the full-length *MsSepF***  
 99 **shows the dimeric state of the protein in solution. *MsSepF* full-length (blue) on a Superdex**  
 100 **S200 10/300 column. The molecular weight (MW) markers are shown in gray with**  
 101 **corresponding MW indicated above. The data shown here are representative for experiments**  
 102 **performed at least twice.**  
 103

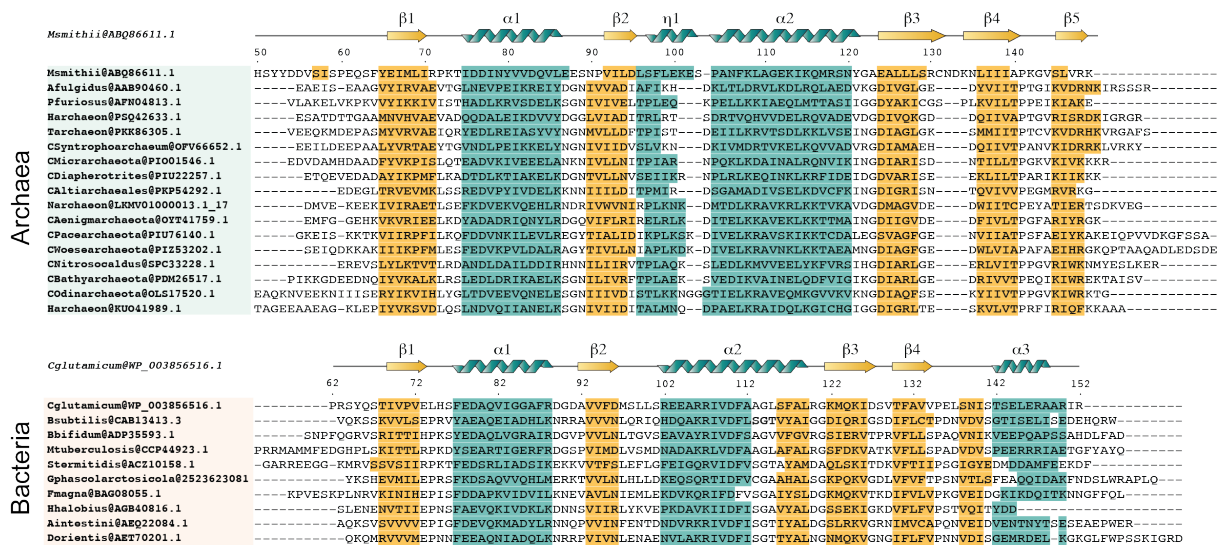

104  
 105 **Supplementary Figure 7. Secondary structure prediction of diverse representative**  
 106 **lineages in archaeal and bacterial SepF. Turquoise indicates predicted  $\alpha$ -helices whereas**  
 107 **yellow indicates predicted  $\beta$ -strands. The experimental secondary structural elements as**  
 108 **inferred from the crystal structures of *M. smithii* (this work) and *C. glutamicum* (PDB code**  
 109 **6SCP) are depicted above each sequence block. Prediction was performed using PSIPRED<sup>3</sup>**  
 110 **and Ali2D<sup>4</sup>**

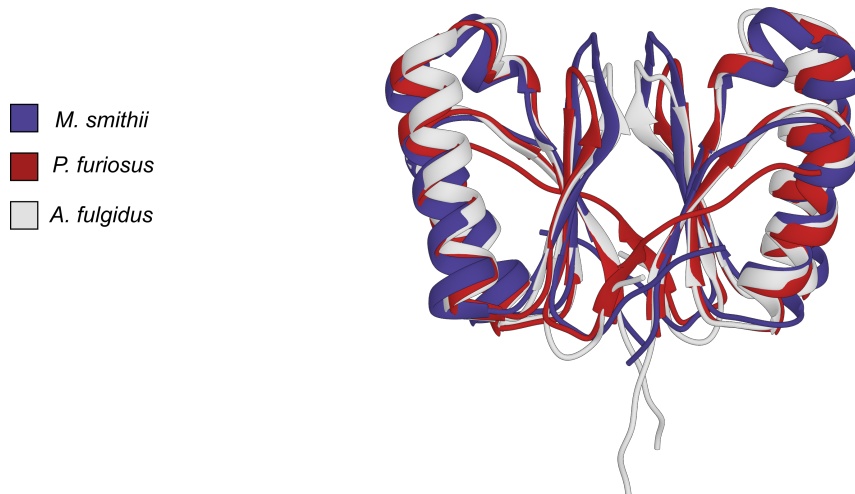

111

112 **Supplementary Figure 8. Comparison of available archaeal SepF structures.**

113 Superposition of all the available archaeal SepF crystal structures (RMSDs of 1.5 - 1.9 Å for  
 114 75 – 77 aligned residues) show the same folding and dimer interface. The three structures  
 115 contain the same secondary structural elements ( $\alpha 1$  to  $\alpha 2$ ,  $\eta 1$  and  $\beta 1$  to  $\beta 5$ ). *Archaeoglobus*  
 116 *fulgidus* (PDB: 3ZIE), *Pyrococcus furiosus* (PDB: 3ZIG) <sup>5</sup>.

117

118

119

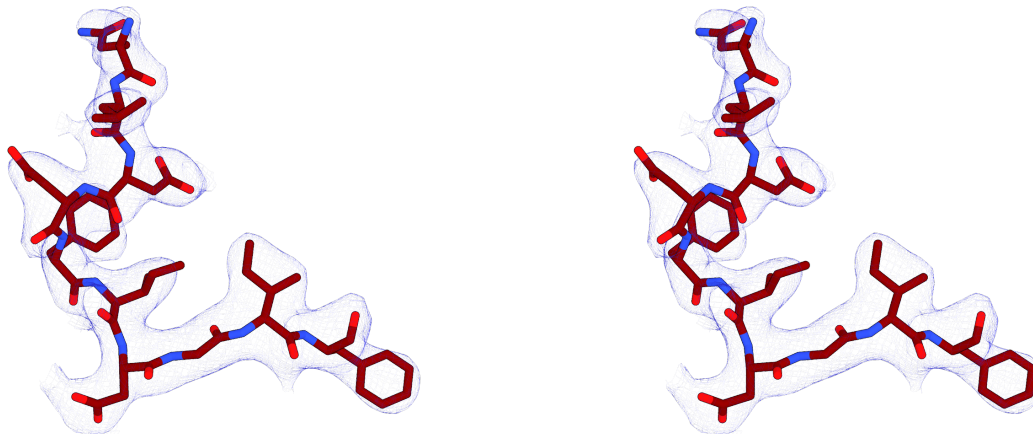

120

121 **Supplementary Figure 9. Stereo representation of the electron density of the FtsZ<sub>CTD</sub>**

122 **peptide bound to MsSepF. Final (2Fo-Fc) electron density map countered at 1.3  $\sigma$ .**



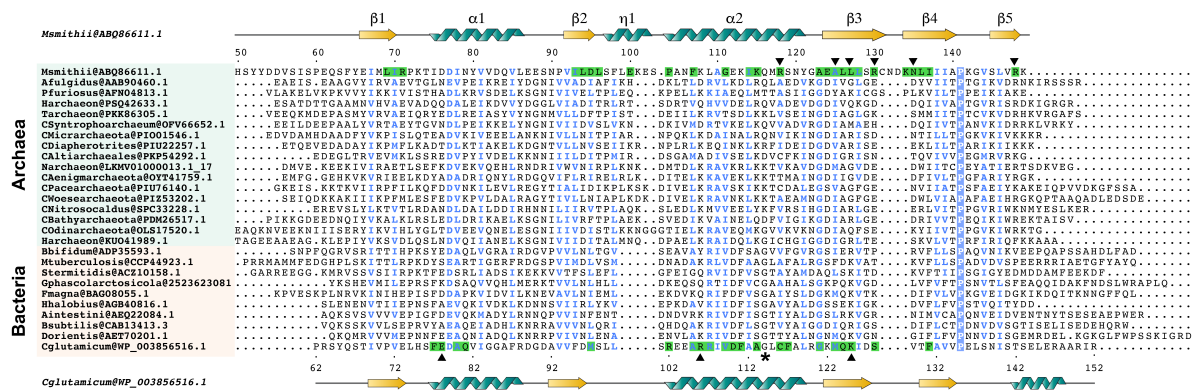

123  
124  
125  
126  
127  
128  
129  
130  
131  
132  
133  
134

**Supplemental Figure 10. Structure-based alignment of archaeal and bacterial SepF homologues.** Sequences from diverse representative lineages in Archaea and Bacteria were chosen and aligned based on structural features. SepF from *M. smithii* (this work) and from *C. glutamicum* (PDB: 6SCP) were chosen as structural models and their secondary structural elements are shown respectively above and below the alignment. Conserved positions are indicated in blue and an asterisk indicates the invariant Gly residue (Gly 114 in CgSepF) that is crucial to form the dimer interface in bacterial homologs. For both crystal structures, FtsZ<sub>CTD</sub> contact residues ( $d < 5 \text{ \AA}$ ) are highlighted in green, and those forming intermolecular hydrogen bonds are marked with a black triangle. Graphical representation was made using ENDscript server<sup>6</sup> and improved manually.

135 a

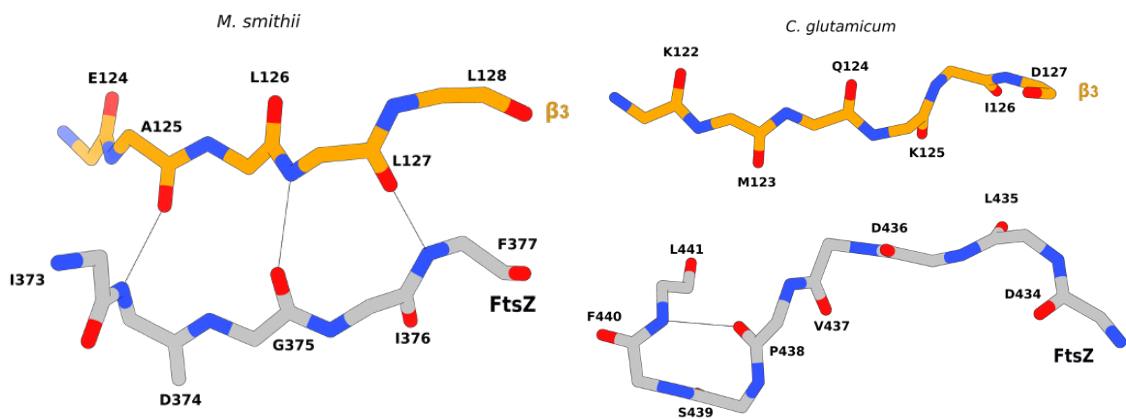

136

137 b

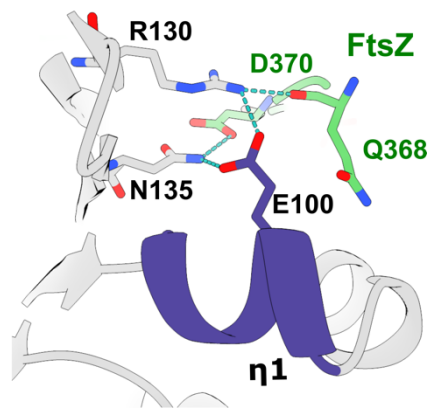

138

139

140 **Supplementary Figure 11. Structural details of FtsZ-SepF interactions.** a. Backbone  
141 interactions between the SepF strand  $\beta 3$  (yellow) and the FtsZ<sub>CTD</sub> main-chain atoms (grey) in  
142 *M. smithii* (left panel) and *C. glutamicum* (right panel). The FtsZ peptide adopts a different  
143 conformation and interacts differently with strand  $\beta 3$  in the two species. For clarity, H bonds  
144 are shown as black lines, and lateral side chains are omitted. b. Hydrogen bonding network  
145 involving the archaeal-specific  $\eta 1$  insertion (purple) in the *Ms*SepF-FtsZ complex.

146

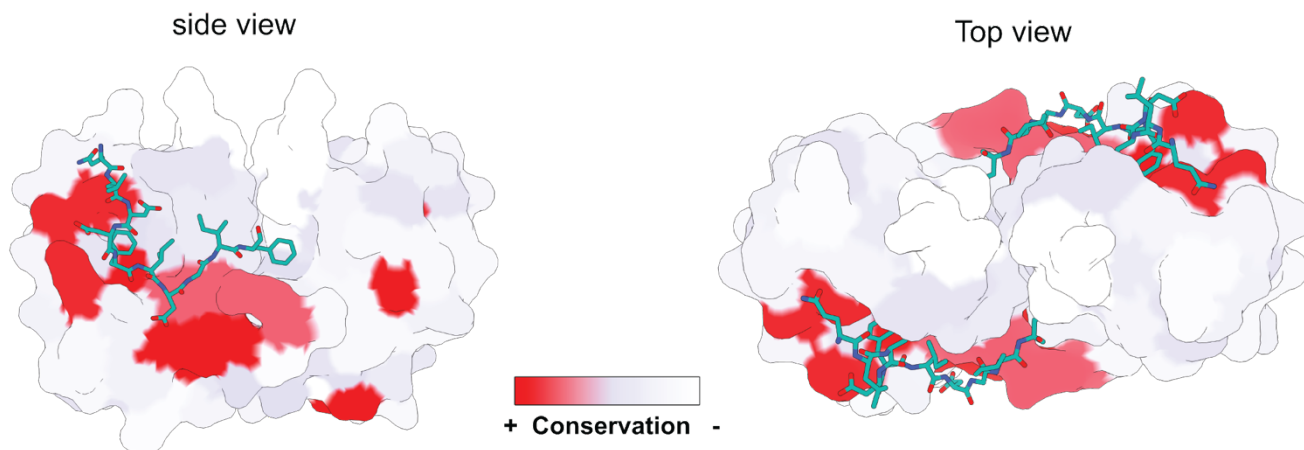

147 **Supplementary Figure 12. Conservation of the FtsZ binding pocket in archaeal SepF.**

148 Conserved regions of archaeal SepF sequences were mapped on the MsSepF<sub>core</sub> structure  
149 using ConSurf-BD<sup>7</sup>. Red represents highly conserved residues, white indicates poorly  
150 conserved residues. Bound FtsZ<sub>CTD</sub> is shown in turquoise and stick representation.

151



153 **Supplementary Figure 13. Genomic context of archaeal FtsZ1, FtsZ2 and SepF**  
154 **homologues mapped on a schematic reference phylogeny of the Archaea.** The genomic  
155 context of the gene coding for FtsZ1 is well conserved in most archaeal lineages. Most of the  
156 genes around *ftsZ1* are involved in transcription, translation and regulation. In contrast, the  
157 genomic contexts of the genes coding for SepF and FtsZ2 are less conserved. In some  
158 members of the DPANN superphylum *sepF* can be found in the same conserved cluster as  
159 *ftsZ1* or *ftsZ2*, supporting the functional link between the two proteins.

160 div. ctrl.: ORC1-type DNA replication protein; dtd: D-aminoacyl-tRNA deacylase; FtsZ: FtsZ,  
161 hypoth.: Uncharacterized protein family (UPF0147); KH-I: K homology RNA-binding domain  
162 type I; proteas.: Proteasome subunit; Rbind.: RNA-binding protein; Rbn.: site RNA binding site;  
163 reduct.: Nitro FMN reductase; RNApol: DNA-directed RNA polymerase; RP: 50S ribosomal  
164 protein; RPL10: Ribosomal protein L10 family; RPL11: 50S ribosomal protein L11; RPL12P:  
165 50S ribosomal protein L12P; RPL1P: 50S ribosomal protein L1P; RPL37: 50S ribosomal  
166 protein L37; tif: translation initiation factor IF-5A; Zn-fing: ZPR1 zinc-finger domain protein. Not  
167 conserved genes are represented in grey.

168

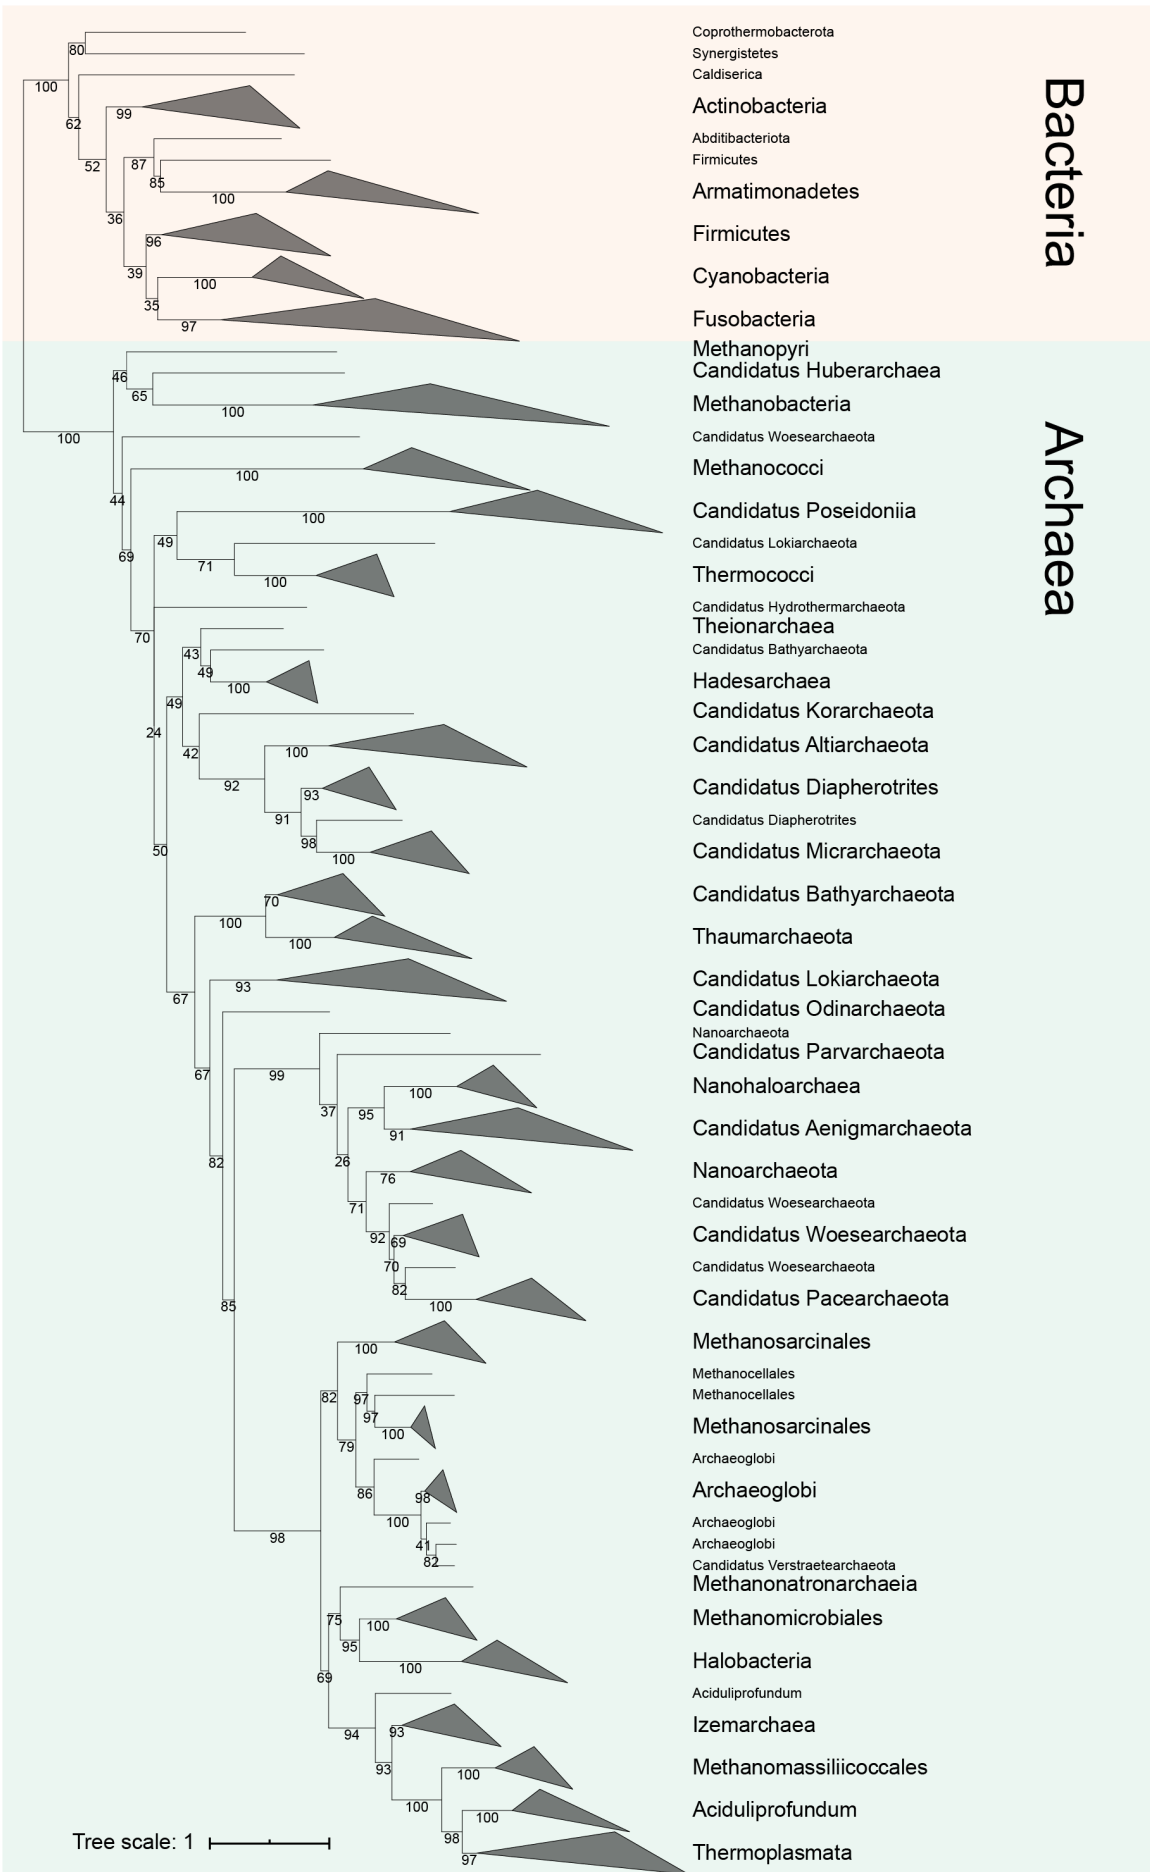

170 **Supplementary Figure 14. Phylogeny of SepF homologues in Bacteria and Archaea.**  
171 Maximum likelihood tree of SepF inferred with IQ-TREE v1.6.7.2 (ModelFinder best-fit model  
172 LG+F+R5)<sup>8, 9</sup> from an alignment of 147 sequences and 143 amino acid positions. Numbers at  
173 nodes represent ultrafast bootstrap supports <sup>10</sup>. The scale bar represents the average number  
174 of substitutions per site. There is a clear separation between Bacteria and Archaea and the  
175 tree roughly recapitulates known phylogenetic relationships. This result suggests that SepF  
176 was already present in the LUCA and followed a mainly vertical evolution in the two prokaryotic  
177 domains. While SepF was lost in many Bacteria, it was largely retained in Archaea.  
178

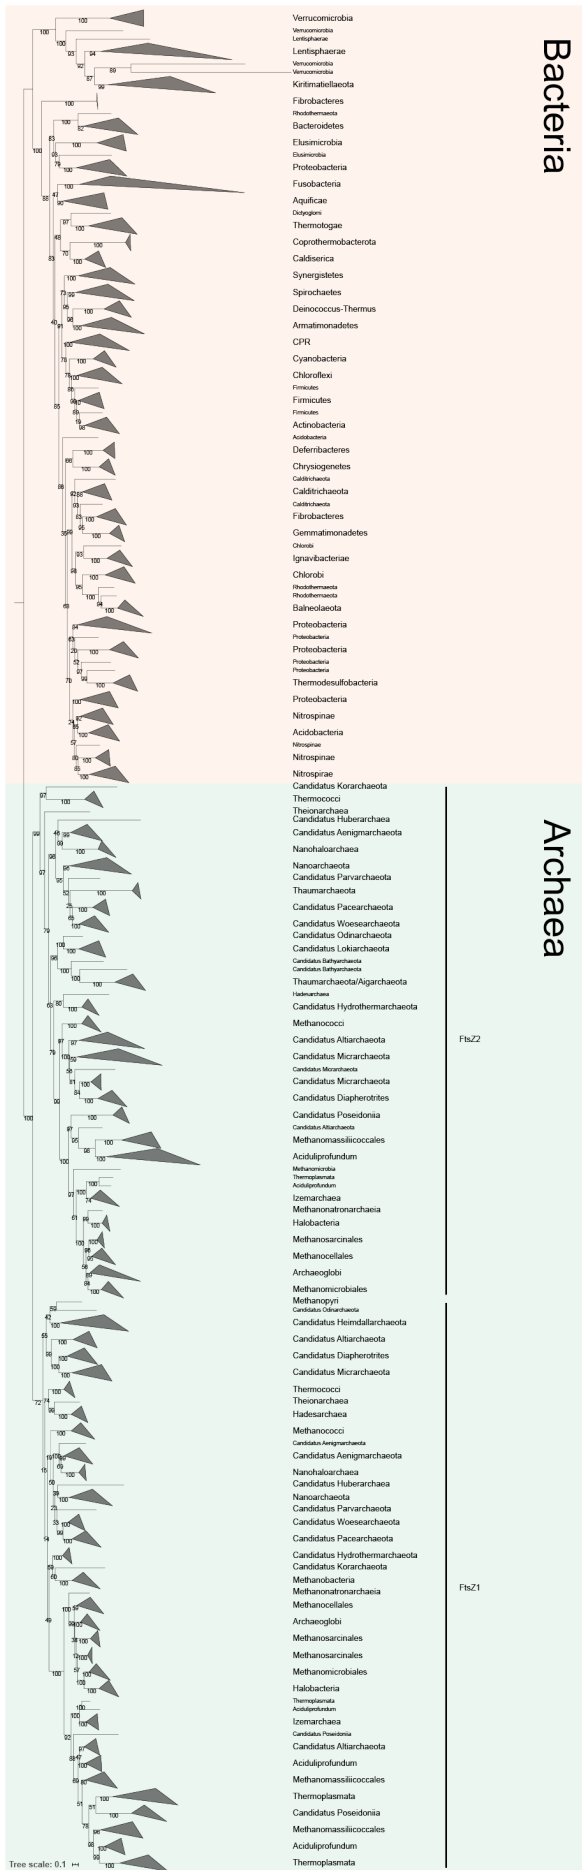



180 **Supplementary Figure 15. Phylogeny of FtsZ homologues in Bacteria and Archaea.**  
181 Maximum likelihood tree of FtsZ inferred with IQ-TREE v1.6.7.2 (ModelFinder best-fit model  
182 LG+R10)<sup>8, 9</sup> from an alignment of 429 sequences and 422 amino acid positions. Numbers at  
183 nodes represent ultrafast bootstrap supports<sup>10</sup>. The scale bar represents the average number  
184 of substitutions per site. The internal topologies roughly recapitulate known phylogenetic  
185 relationships, suggesting that FtsZ was already present in the LUCA. The separation of the  
186 two archaeal FtsZ1 and FtsZ2 copies suggests that they arose from an early gene duplication.  
187

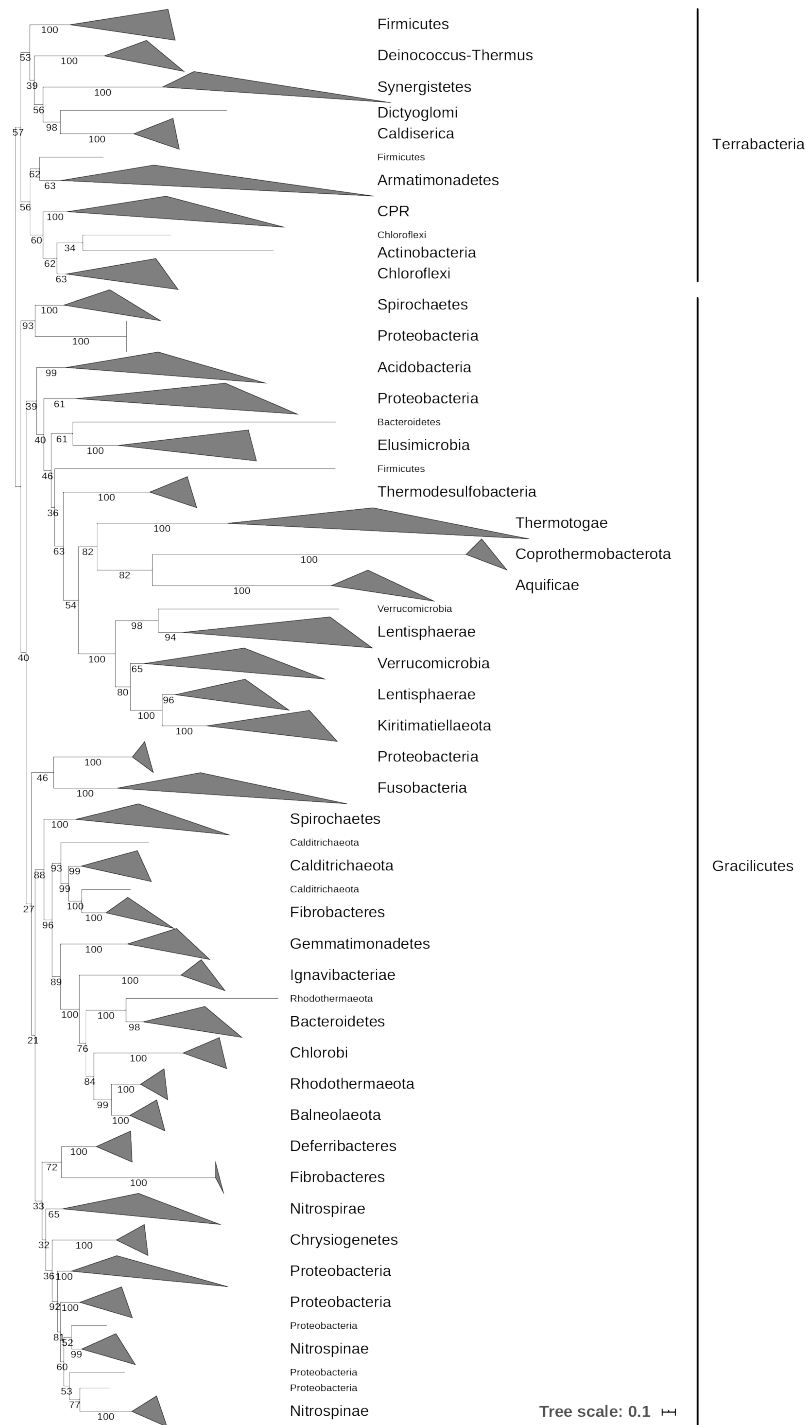

188

189 **Supplementary Figure 16. Phylogeny of FtsA homologues in Bacteria.**

190 Maximum likelihood tree of FtsA inferred with IQ-TREE v1.6.7.2 (ModelFinder best-fit model  
 191 LG+R6)<sup>8, 9</sup> from an alignment of 163 sequences and 426 amino acid positions. Numbers at  
 192 nodes represent ultrafast bootstrap supports<sup>10</sup>. The scale bar represents the average number  
 193 of substitutions per site. The tree roughly recapitulates known phylogenetic relationships,  
 194 suggesting that FtsA was already present in the LBCA (Last Bacterial Common Ancestor).

**Supplementary Table 1.** Bacterial strains and plasmids used in this study.

| Strain or plasmid             | Characteristics                                                                                                                                                                                                                                                                           | References |
|-------------------------------|-------------------------------------------------------------------------------------------------------------------------------------------------------------------------------------------------------------------------------------------------------------------------------------------|------------|
| <b><i>E. coli</i></b>         |                                                                                                                                                                                                                                                                                           |            |
| <b>DH5<math>\alpha</math></b> | F- endA1 $\Phi$ 80dlacZ $\Delta$ M15 $\Delta$ (lacZYA-argF)U169 recA1 relA1 hsdR17(rK-mK+) deoR supE44 thi-1 gyrA96 phoA $\lambda$ -; strain used for general cloning procedures                                                                                                          | 11         |
| Top10                         | F- <i>mcrA</i> $\Delta$ ( <i>mrr-hsdRMS-mcrBC</i> ) $\Phi$ 80 <i>lacZ</i> $\Delta$ M15 $\Delta$ <i>lacX74</i> <i>recA1</i> <i>araD139</i> $\Delta$ ( <i>araleu</i> )7697 <i>galU</i> <i>galK</i> <i>rpsL</i> (StrR) <i>endA1</i> <i>nupG</i> ; strain used for general cloning procedures |            |
| BL21(DE3)                     | F- ompT hsdSB(rB-mB-) gal dcm (DE3); host for protein production                                                                                                                                                                                                                          | 12         |
| <b><i>M. wolfeii</i></b>      |                                                                                                                                                                                                                                                                                           |            |
| DSM 2970                      | Methanogenic, anaerobic, 60°C, type strain,                                                                                                                                                                                                                                               | 13<br>14   |
| <b><i>M. smithii</i></b>      |                                                                                                                                                                                                                                                                                           |            |
| DSM 861                       | Methanogenic, anaerobic, 37°C, type strain                                                                                                                                                                                                                                                | 15         |
| <b>Plasmids</b>               |                                                                                                                                                                                                                                                                                           |            |
| <b>pET-15b</b>                | T7 promotor, His-tag, multiple cloning sites ( <i>Nde</i> I - <i>Bam</i> HI), lacI, AmpR                                                                                                                                                                                                  |            |
| <b>pET-15b_peiW</b>           | AmpR, pET derived for <i>M. wolfeii</i> <i>peiW</i> recombinant expression containing a N-terminal His-tag followed by a thrombin cleavage site                                                                                                                                           | 16         |
| <b>pET-SUMO-sepF_full</b>     | KanaR; pET derivate for <i>M.smithii</i> SepF recombinant expression containing a N-terminal His-tag followed by a SUMO protease cleavage site                                                                                                                                            | This work  |
| <b>pET-SUMO-sepF_core</b>     | KanaR; pET derivate for <i>M.smithii</i> SepF (53-149) recombinant expression containing a N-terminal His-tag followed by a SUMO protease cleavage site                                                                                                                                   | This work  |
| <b>pET-SUMO-ftsZ_full</b>     | KanaR; pET derivate for <i>M.smithii</i> FtsZ recombinant expression containing a N-terminal His-tag followed by a SUMO protease cleavage site                                                                                                                                            | This work  |

196  
197  
198  
199  
200  
201  
202  
203  
204  
205  
206

207 **Supplementary Table 2. Oligonucleotides used in this study**

| Oligonucleotide                                                                                | Sequence (5' → 3') and properties *             |
|------------------------------------------------------------------------------------------------|-------------------------------------------------|
| <b>Construction of pET-15b_ <i>peiW</i></b>                                                    |                                                 |
| PeiWF2                                                                                         | AGGTGATCATATGGAAGTGGGGCTAAATG                   |
| PeiWR2                                                                                         | AACA <u>ACTCGAGCATGTCTCTGCC</u> CAAAC           |
| <b>Construction of pET-SUMO-<i>sepF</i>_full</b>                                               |                                                 |
| Ms_SepF_full_f                                                                                 | <b>CGAACAGATTGGTGGC</b> ATGGGTTTCACTGATG        |
| Ms_SepF_full_r                                                                                 | <b>GTTAGCAGCCGGATCTCTACTTTCTAACTAACTGACTCC</b>  |
| <b>Construction of pET-SUMO-<i>sepF</i>_core</b>                                               |                                                 |
| Ms_SepF_core_f                                                                                 | <b>CGAACAGATTGGTGGC</b> GATGATGTGTCTATTTCTCC    |
| Ms_SepF_full_r                                                                                 | <b>GTTAGCAGCCGGATCTCTACTTTCTAACTAACTGACTCC</b>  |
| <b>Construction of pET-SUMO-<i>ftsZ</i>_full</b>                                               |                                                 |
| Ms_FtsZ_full_f                                                                                 | <b>CGAACAGATTGGTGGC</b> GTGAAATTTATAGATGATGC    |
| Ms_FtsZ_full_r                                                                                 | <b>GTTAGCAGCCGGATCTTTAGAATATTCCATCAATGAAATC</b> |
| <b>Primers for colony PCR used during the construction of the pET-15b_ <i>peiW</i> plasmid</b> |                                                 |
| T7                                                                                             | TAATACGACTCACTATAGGG                            |
| T7_term                                                                                        | CTAGTTATTGCTCAGCGGT                             |
| <b>Primers for colony PCR used during the construction of the different pET-SUMO plasmids</b>  |                                                 |
| 188_pAW-27                                                                                     | CCCGCGAAATTAATACGACTCAC                         |
| 187_pAW-26                                                                                     | CCTCAAGACCCGTTTAGAGGCC                          |
| *Overlaps for Gibson assembly are written in bold letters. Restriction sites are underlined.   |                                                 |

208

209

210

211

212

213

214

215

216

217

218

219

220

221 **Supplementary Table 3. SIMcheck results**

| <b>Concerning cell from figure 2a right panel</b>                                                                                                                                                                                                                                                                                                                                                                |                                  |              |             |
|------------------------------------------------------------------------------------------------------------------------------------------------------------------------------------------------------------------------------------------------------------------------------------------------------------------------------------------------------------------------------------------------------------------|----------------------------------|--------------|-------------|
| <b>Check</b>                                                                                                                                                                                                                                                                                                                                                                                                     | <b>Statistic</b>                 | <b>Value</b> | <b>Pass</b> |
| CIP*                                                                                                                                                                                                                                                                                                                                                                                                             | C1 total intensity variation (%) | 23.7         | Yes         |
| CIP*                                                                                                                                                                                                                                                                                                                                                                                                             | C2 total intensity variation (%) | 6.07         | Yes         |
| MCN <sup>+</sup>                                                                                                                                                                                                                                                                                                                                                                                                 | C1 average feature MCNR          | 19.3         | Yes         |
| MCN <sup>+</sup>                                                                                                                                                                                                                                                                                                                                                                                                 | C2 average feature MCNR          | 19.7         | Yes         |
| RIH <sup>#</sup>                                                                                                                                                                                                                                                                                                                                                                                                 | C1 max-to-min intensity ratio    | 6,7          | Yes         |
| RIH <sup>#</sup>                                                                                                                                                                                                                                                                                                                                                                                                 | C2 max-to-min intensity ratio    | 14.1         | Yes         |
| <b>Concerning cell from figure 2a left panel</b>                                                                                                                                                                                                                                                                                                                                                                 |                                  |              |             |
| <b>Check</b>                                                                                                                                                                                                                                                                                                                                                                                                     | <b>Statistic</b>                 | <b>Value</b> | <b>Pass</b> |
| CIP*                                                                                                                                                                                                                                                                                                                                                                                                             | C1 total intensity variation (%) | 8.84         | Yes         |
| CIP*                                                                                                                                                                                                                                                                                                                                                                                                             | C2 total intensity variation (%) | 14.7         | Yes         |
| MCN <sup>+</sup>                                                                                                                                                                                                                                                                                                                                                                                                 | C1 average feature MCNR          | 27.6         | Yes         |
| MCN <sup>+</sup>                                                                                                                                                                                                                                                                                                                                                                                                 | C2 average feature MCNR          | 37           | Yes         |
| RIH <sup>#</sup>                                                                                                                                                                                                                                                                                                                                                                                                 | C1 max-to-min intensity ratio    | 8            | Yes         |
| RIH <sup>#</sup>                                                                                                                                                                                                                                                                                                                                                                                                 | C2 max-to-min intensity ratio    | 9.6          | Yes         |
| * Channel Intensity Profiles; total intensity variation > ~50% over the 9-z-window used to reconstruct each z-section may cause artifacts<br>+ Modulation contrast-to-noise ratio (MCNR) image; inadequate (<4), low to moderate (4-8), good (8-12), very good-excellent (>12)<br># Reconstructed Intensity Histogram; max-to-min intensity ratio, MMR <3 is inadequate, 3-6 is low, 6-12 is good, >12 excellent |                                  |              |             |

222

223

224

225

226

227

228

229

230

231 **Supplementary references**

- 232 1. Gautier, R., Douguet, D., Antony, B. & Drin, G. HELIQUEST: a web server to  
233 screen sequences with specific  $\alpha$ -helical properties. *Bioinformatics* **24**, 2101–  
234 2102 (2008).
- 235 2. Mészáros, B., Erdos, G. & Dosztányi, Z. IUPred2A: context-dependent  
236 prediction of protein disorder as a function of redox state and protein binding.  
237 *Nucleic Acids Res.* **46**, W329–W337 (2018).
- 238 3. Jones, D. T. Protein secondary structure prediction based on position-specific  
239 scoring matrices. *J. Mol. Biol.* **292**, 195–202 (1999).
- 240 4. Zimmermann, L. *et al.* A Completely Reimplemented MPI Bioinformatics Toolkit  
241 with a New HHpred Server at its Core. *J. Mol. Biol.* **430**, 2237–2243 (2018).
- 242 5. Duman, R. *et al.* Structural and genetic analyses reveal the protein SepF as a  
243 new membrane anchor for the Z ring. *Proc. Natl. Acad. Sci.* **110**, E4601–E4610  
244 (2013).
- 245 6. Robert, X. & Gouet, P. Deciphering key features in protein structures with the  
246 new ENDscript server. *Nucleic Acids Res.* **42**, (2014).
- 247 7. Goldenberg, O., Erez, E., Nimrod, G. & Ben-Tal, N. The ConSurf-DB: pre-  
248 calculated evolutionary conservation profiles of protein structures. *Nucleic*  
249 *Acids Res.* **37**, D323-7 (2009).
- 250 8. Nguyen, L.-T., Schmidt, H. A., von Haeseler, A. & Minh, B. Q. IQ-TREE: a fast  
251 and effective stochastic algorithm for estimating maximum-likelihood  
252 phylogenies. *Mol. Biol. Evol.* **32**, 268–74 (2015).
- 253 9. Kalyaanamoorthy, S., Minh, B. Q., Wong, T. K. F., Von Haeseler, A. & Jermini,  
254 L. S. ModelFinder: Fast model selection for accurate phylogenetic estimates.  
255 *Nat. Methods* **14**, 587–589 (2017).

- 256 10. Minh, B. Q., Nguyen, M. A. T. & Von Haeseler, A. Ultrafast approximation for  
257 phylogenetic bootstrap. *Mol. Biol. Evol.* **30**, 1188–1195 (2013).
- 258 11. Hanahan, D. Studies on transformation of *Escherichia coli* with plasmids. *J.*  
259 *Mol. Biol.* **166**, 557–580 (1983).
- 260 12. Studier, F. W. & Moffatt, B. A. Use of bacteriophage T7 RNA polymerase to  
261 direct selective high-level expression of cloned genes. *J. Mol. Biol.* **189**, 113–  
262 130 (1986).
- 263 13. Winter, J. *et al.* *Methanobacterium wolfei*, sp. nov., a New Tungsten-Requiring,  
264 Thermophilic, Autotrophic Methanogen. *Syst. Appl. Microbiol.* **5**, 457–466  
265 (1984).
- 266 14. Wasserfallen, A., Nölling, J., Pfister, P., Reeve, J. & De Macario, E. C.  
267 Phylogenetic analysis of 18 thermophilic *Methanobacterium* isolates supports  
268 the proposals to create a new genus, *Methanothermobacter* gen. nov., and to  
269 reclassify several isolates in three species, *Methanothermobacter*  
270 *thermautotrophicus* comb. nov., *Methanothermobacter wolfeii* comb. nov., and  
271 *Methanothermobacter marburgensis* sp. nov. *Int. J. Syst. Evol. Microbiol.* **50**,  
272 43–53 (2000).
- 273 15. Balch, W. E., Fox, G. E., Magrum, L. J., Woese, C. R. & Wolfe, R. S.  
274 Methanogens: reevaluation of a unique biological group. *Microbiol. Mol. Biol.*  
275 *Rev.* **43**, (1979).
- 276 16. Nakamura, K. *et al.* Application of pseudomurein endoisopeptidase to  
277 fluorescence in situ hybridization of methanogens within the family  
278 *Methanobacteriaceae*. *Appl. Environ. Microbiol.* **72**, 6907–6913 (2006).
- 279
